# Supplementary material for: Loss of Key EMT-Regulating miRNAs Highlight the Role of ZEB1 in EGFR Tyrosine Kinase Inhibitor-Resistant NSCLC
Source: MDPI journal article supplement (doi:10.3390/ijms241914742), 2023-09-29

Western Blot Original Files

# Protein Expression of EMT Markers (Figure 2e)

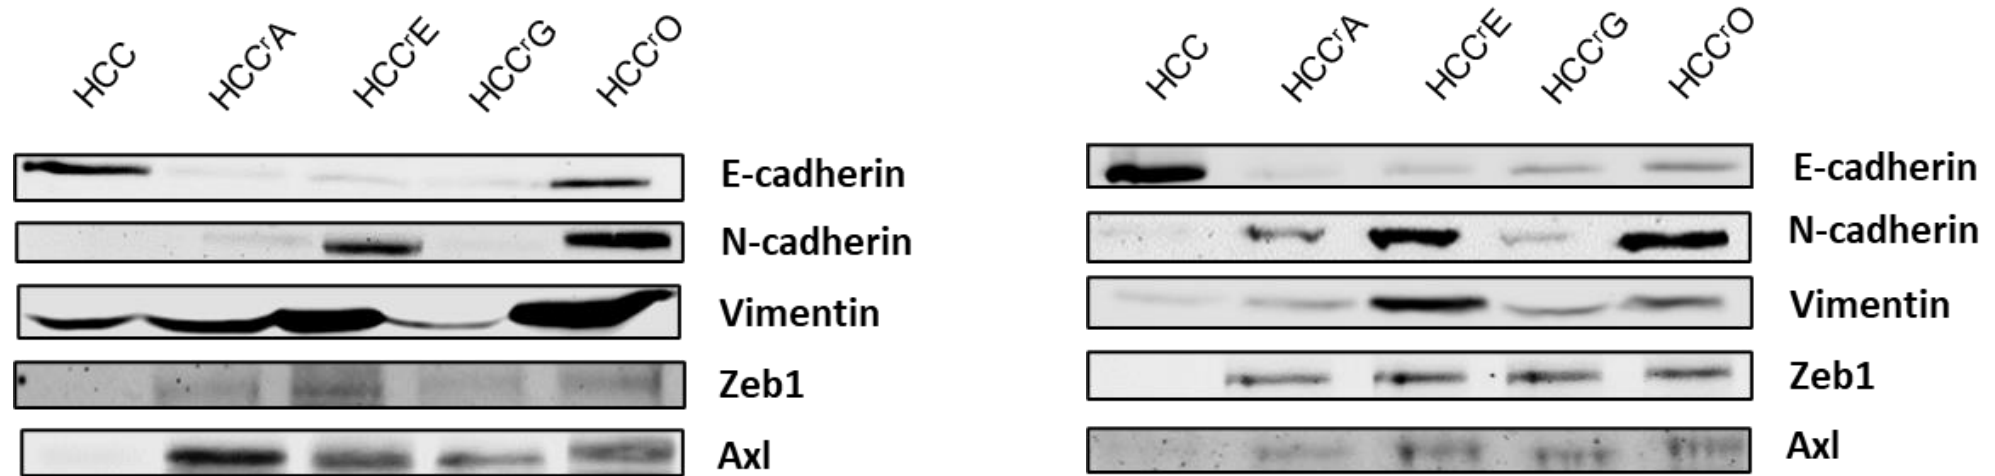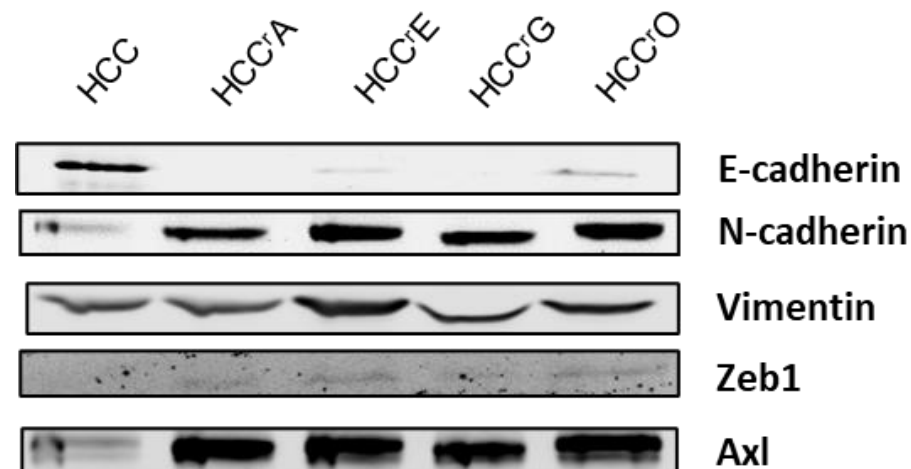

Biological Replicate 1

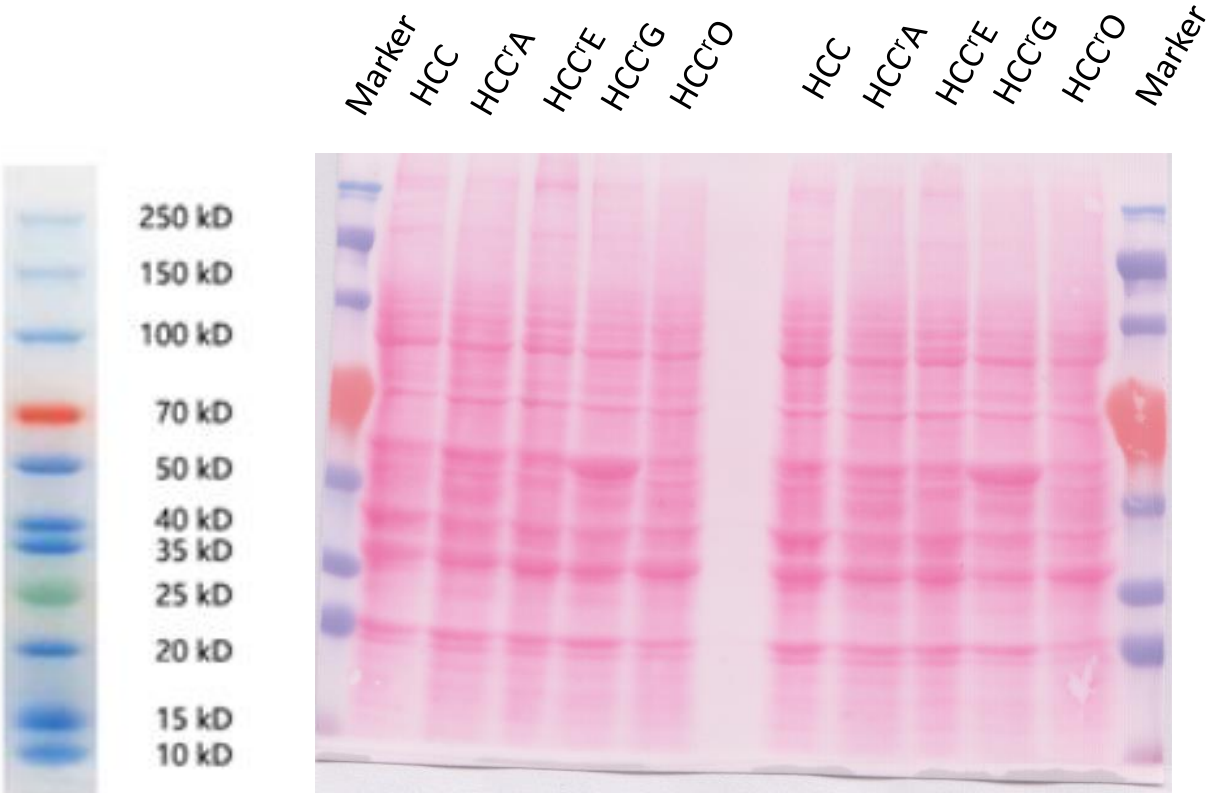

Technical Replicate 1

Technical Replicate 2

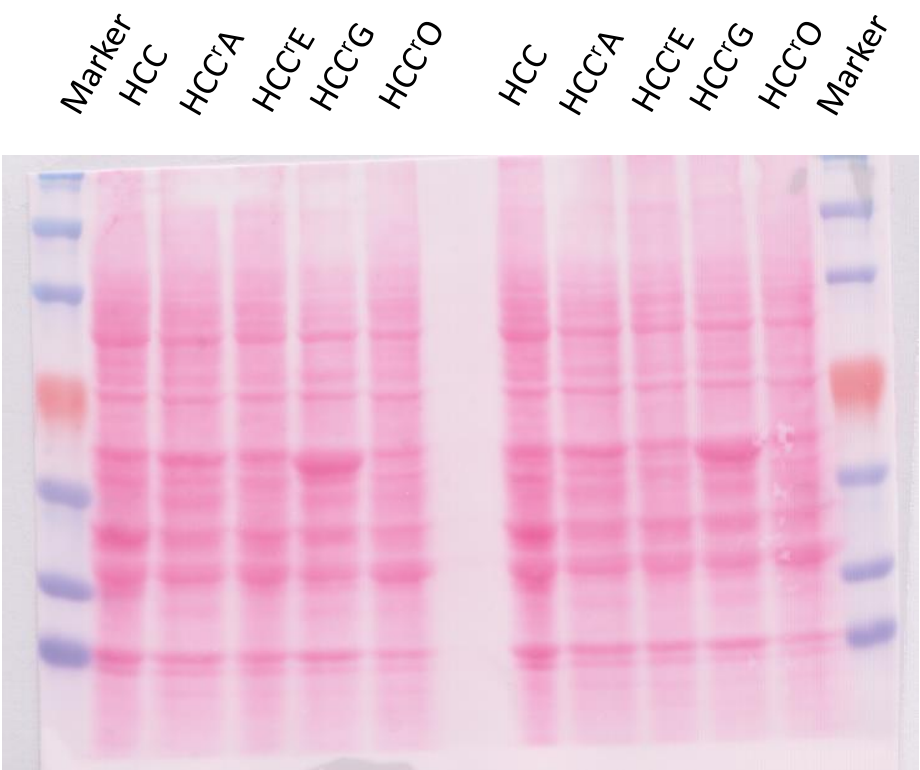

Technical Replicate 3

Technical Replicate 4

Biological Replicate 1

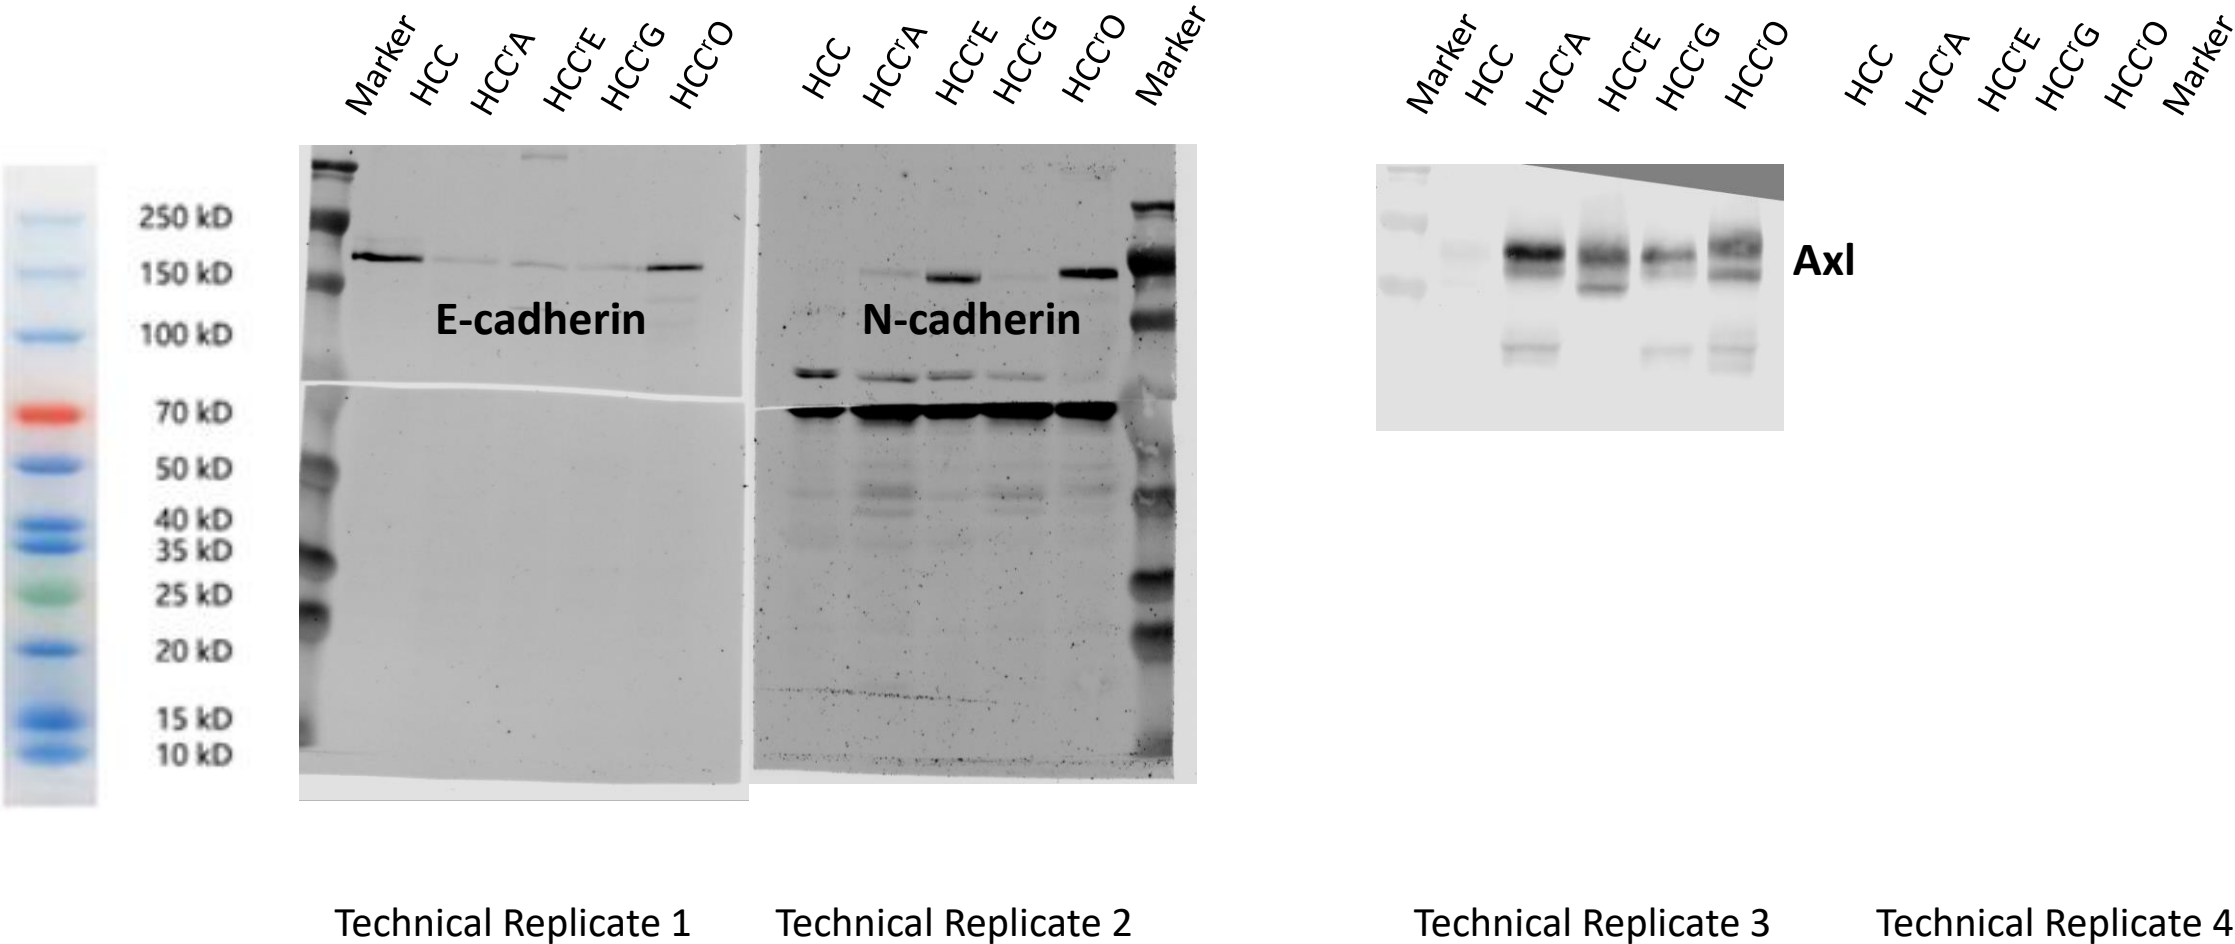

Biological Replicate 1

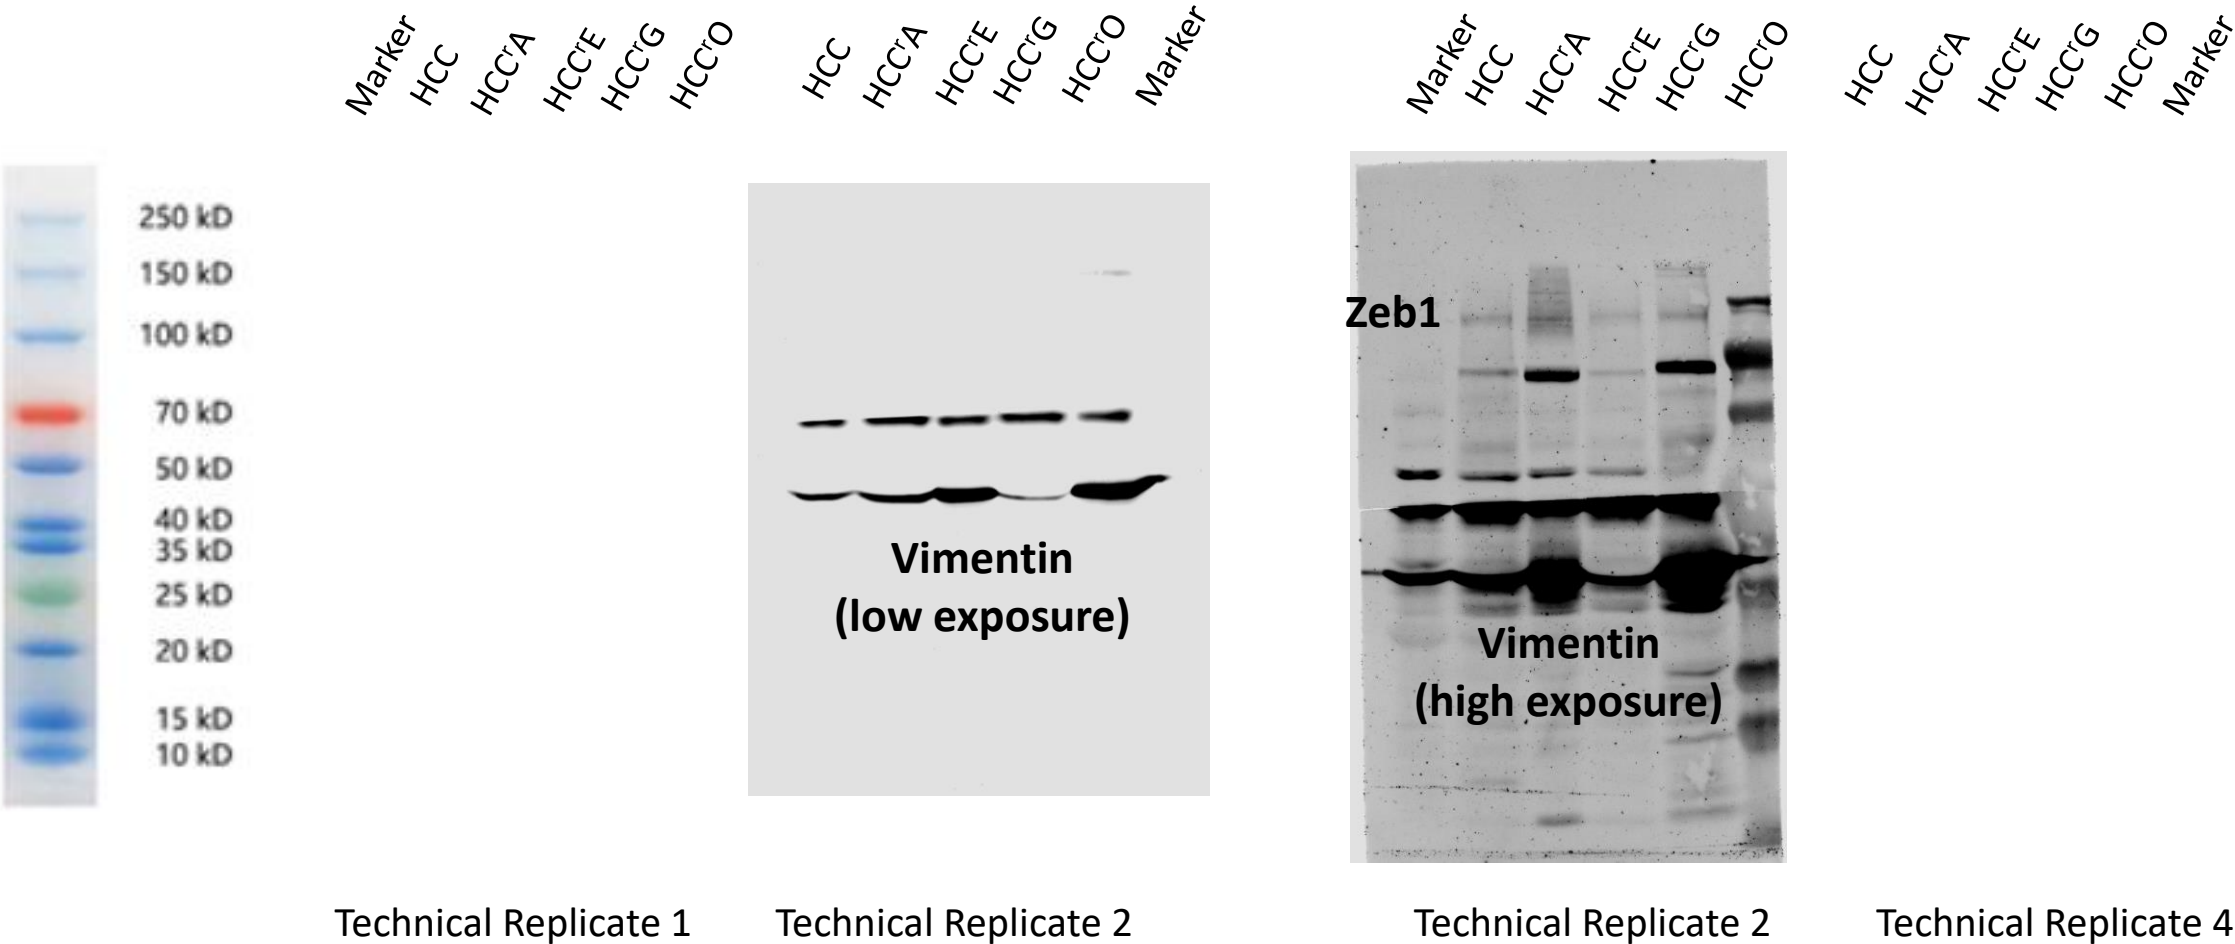

Biological Replicate 2

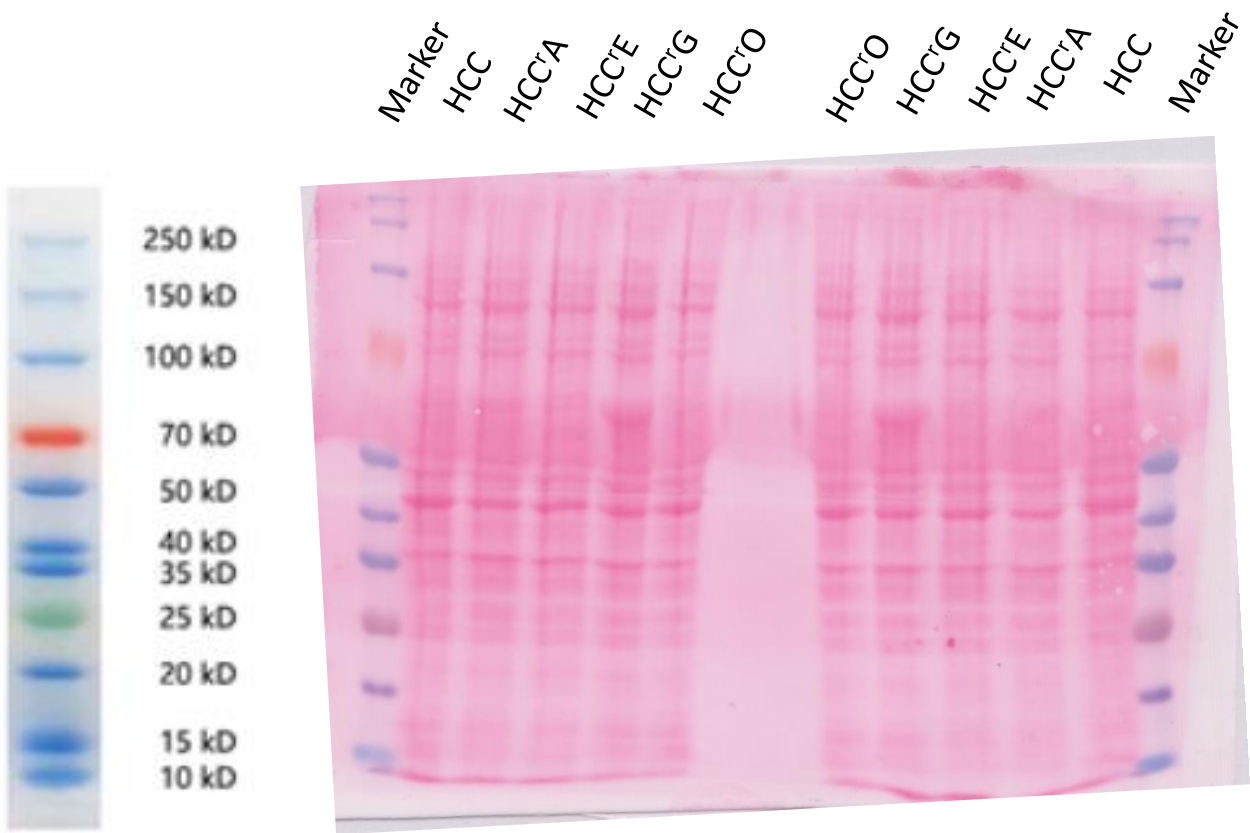

Technical Replicate 1

Technical Replicate 2

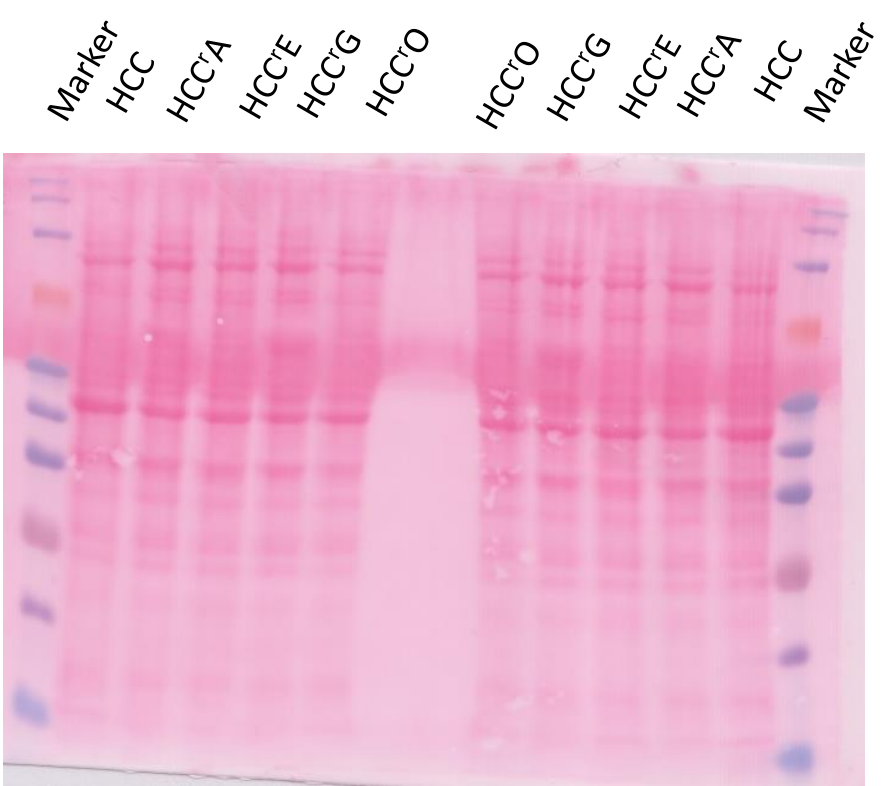

Technical Replicate 3

Technical Replicate 4

Biological Replicate 2

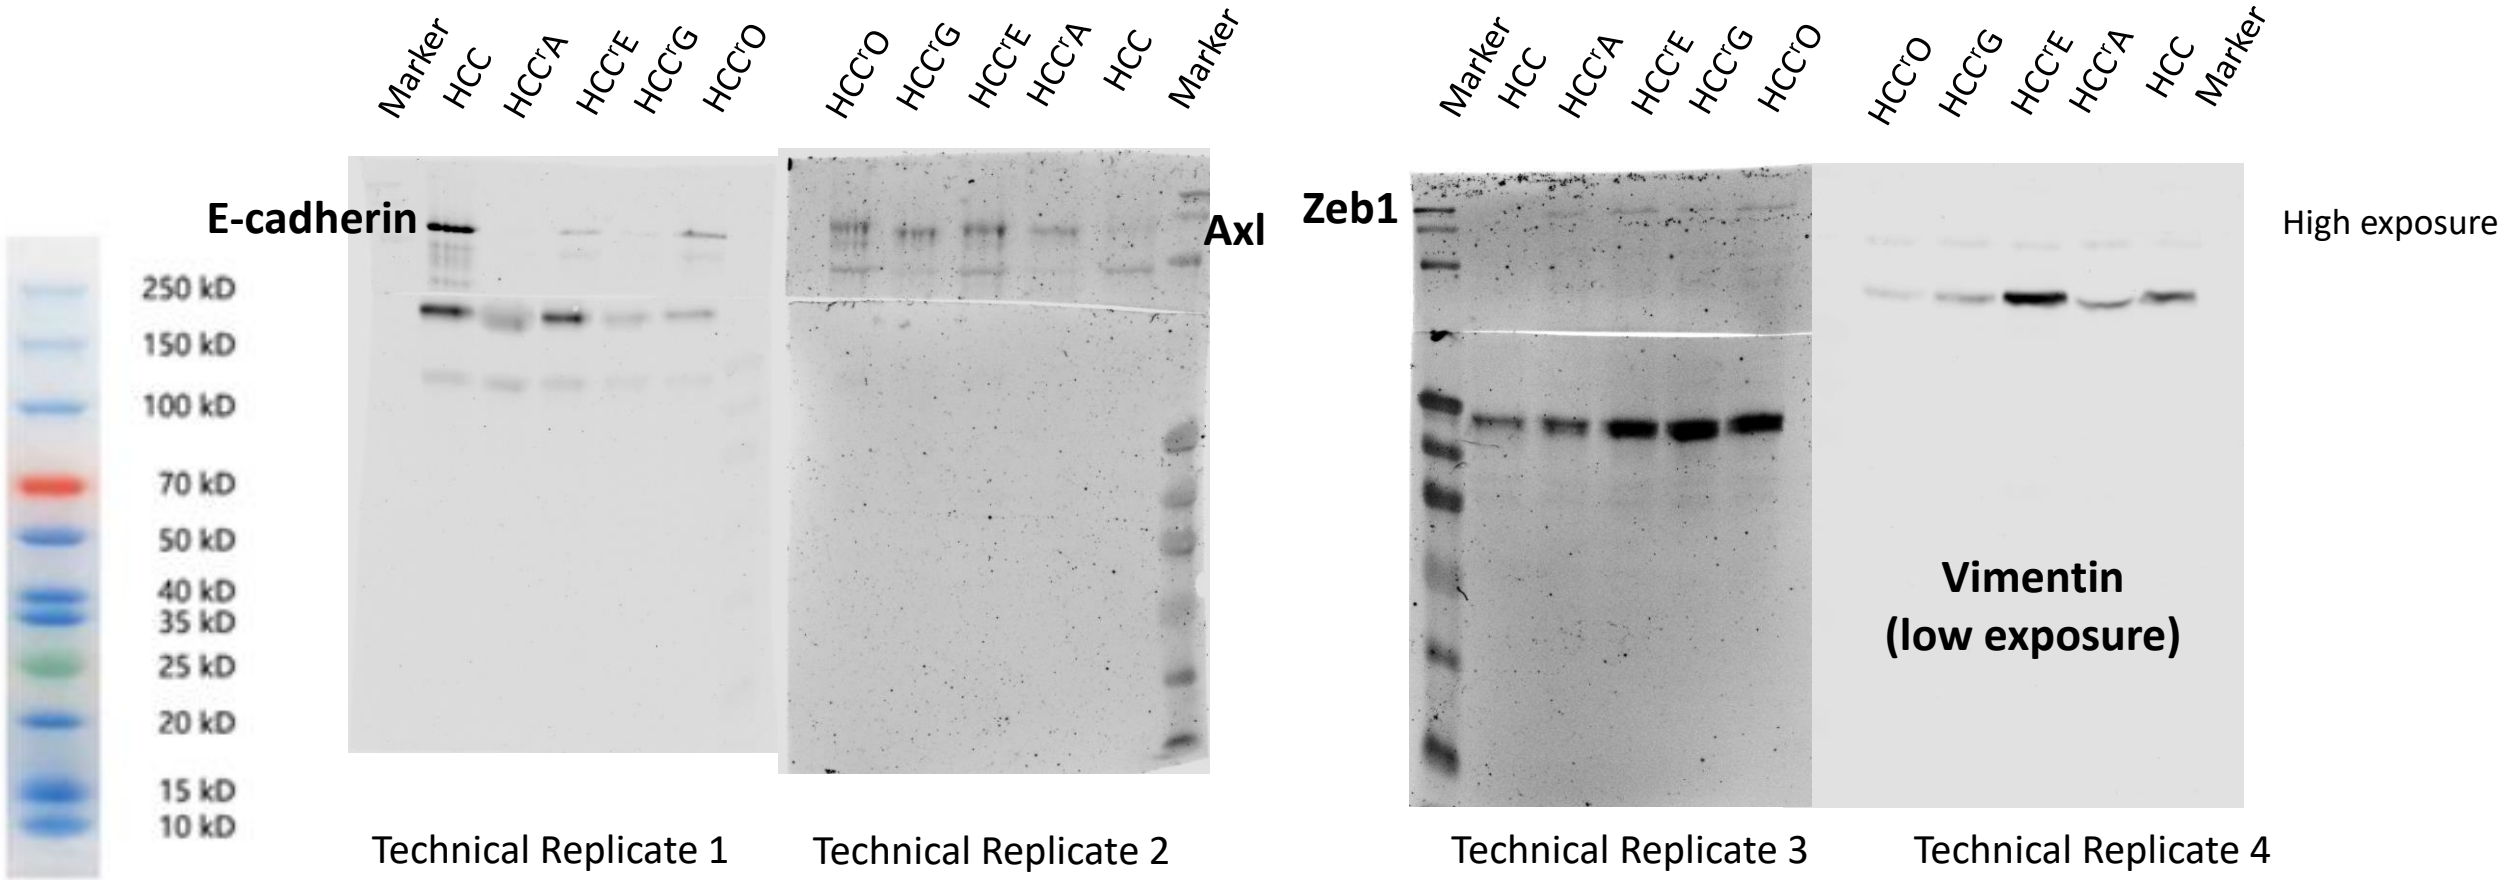

Biological Replicate 2

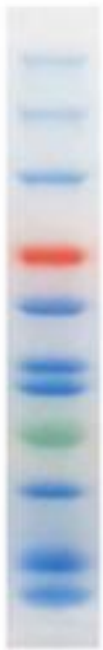

Marker HCC HCC'A HCC'E HCC'G HCC'O HCC'O HCC'G HCC'E HCC'A HCC Marker

Technical Replicate 1 Technical Replicate 2

N-cadherin

Marker HCC HCC'A HCC'E HCC'G HCC'O HCC'O HCC'G HCC'E HCC'A HCC Marker

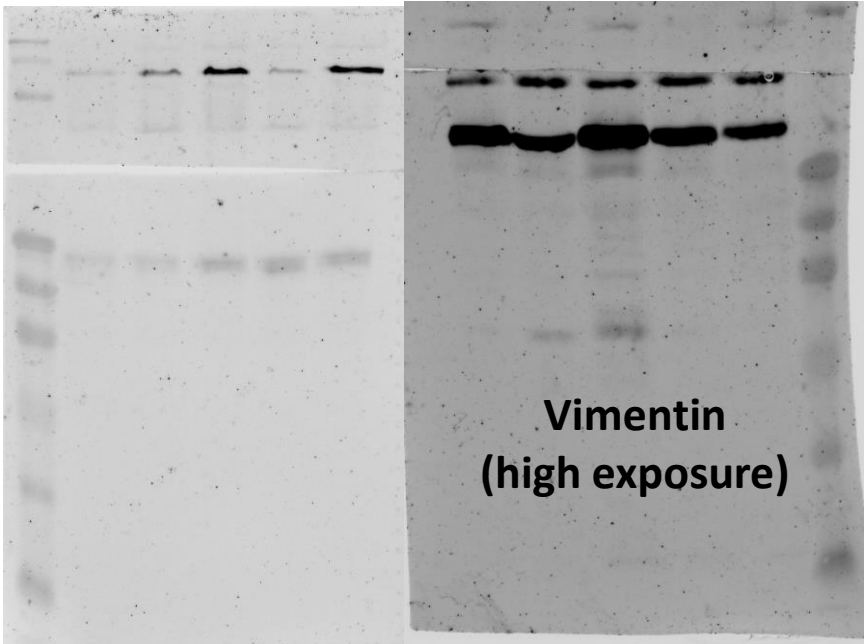

Technical Replicate 3 Technical Replicate 4



Biological Replicate 3

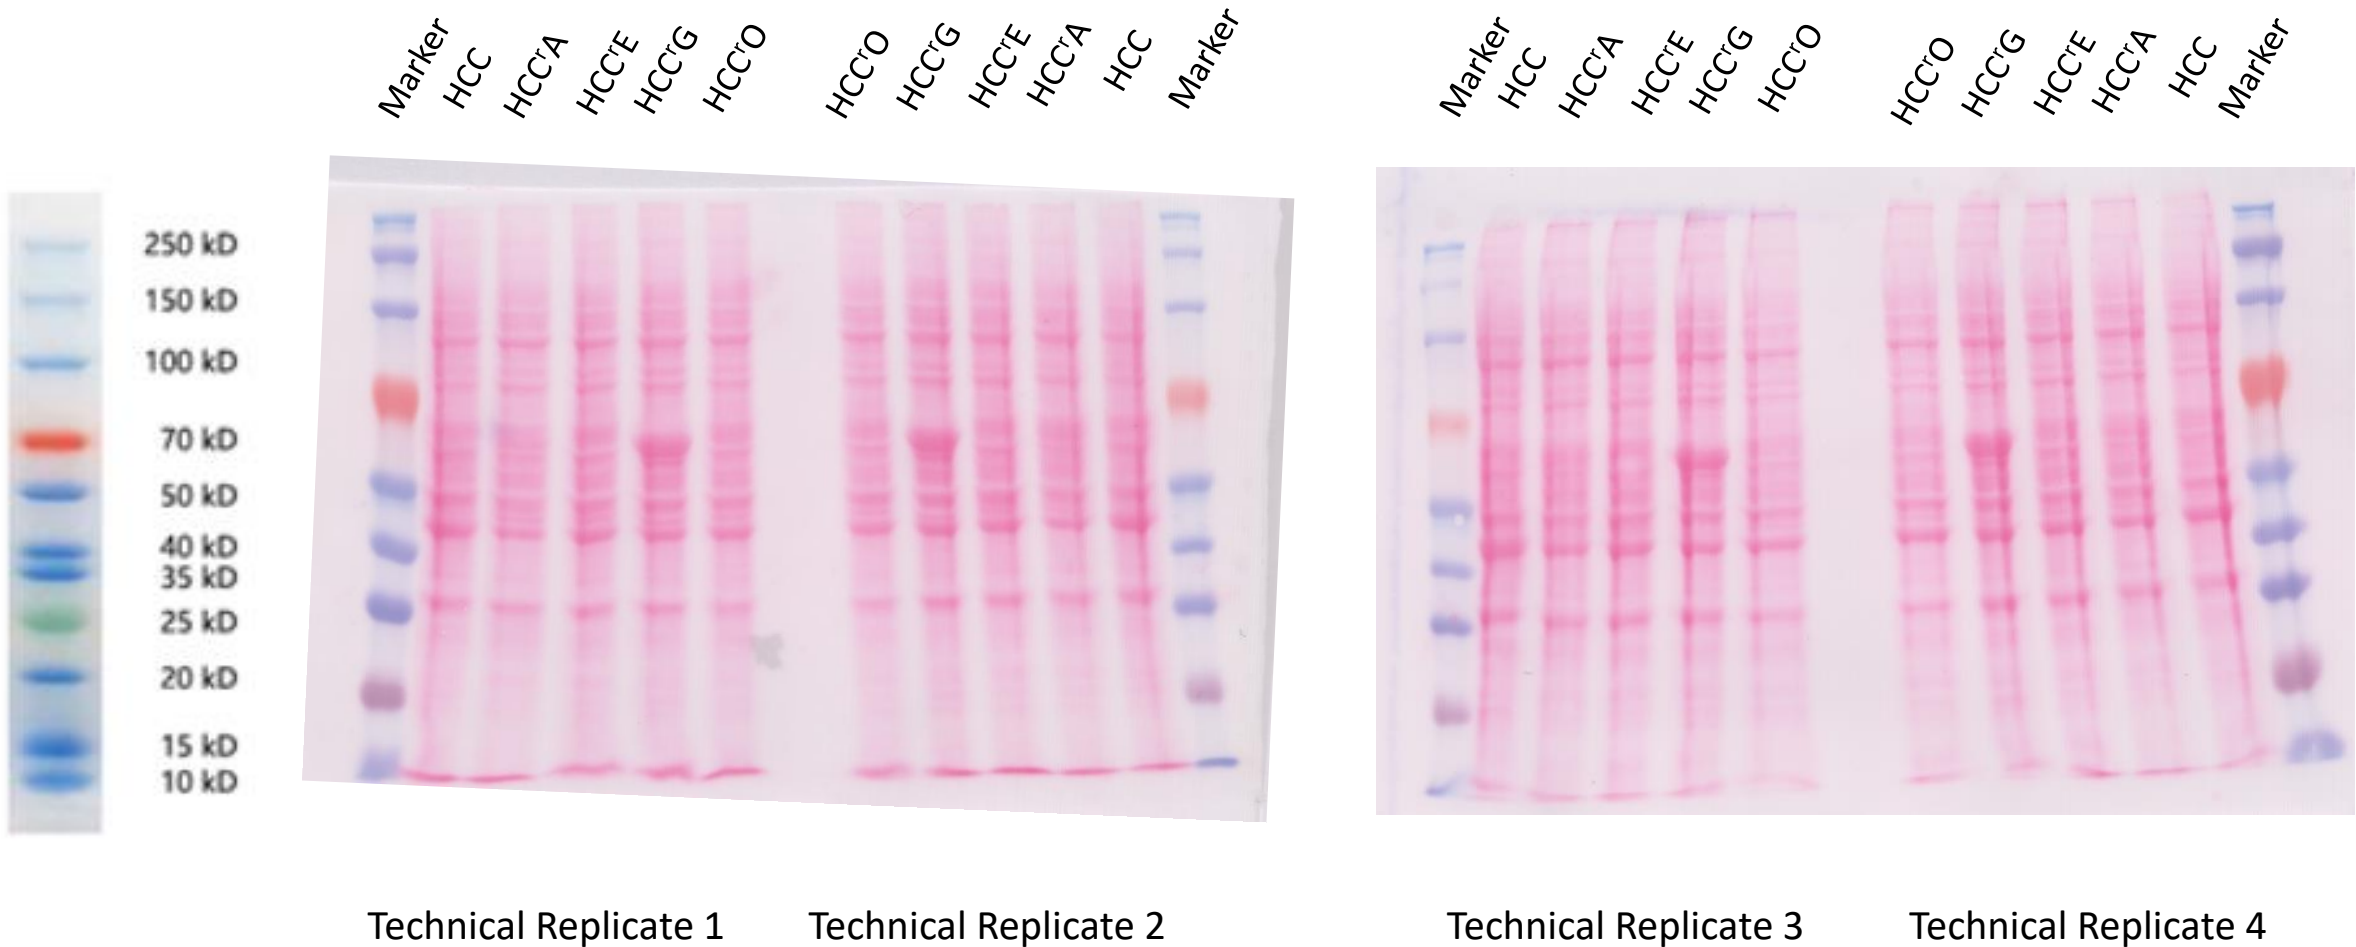

Biological Replicate 3

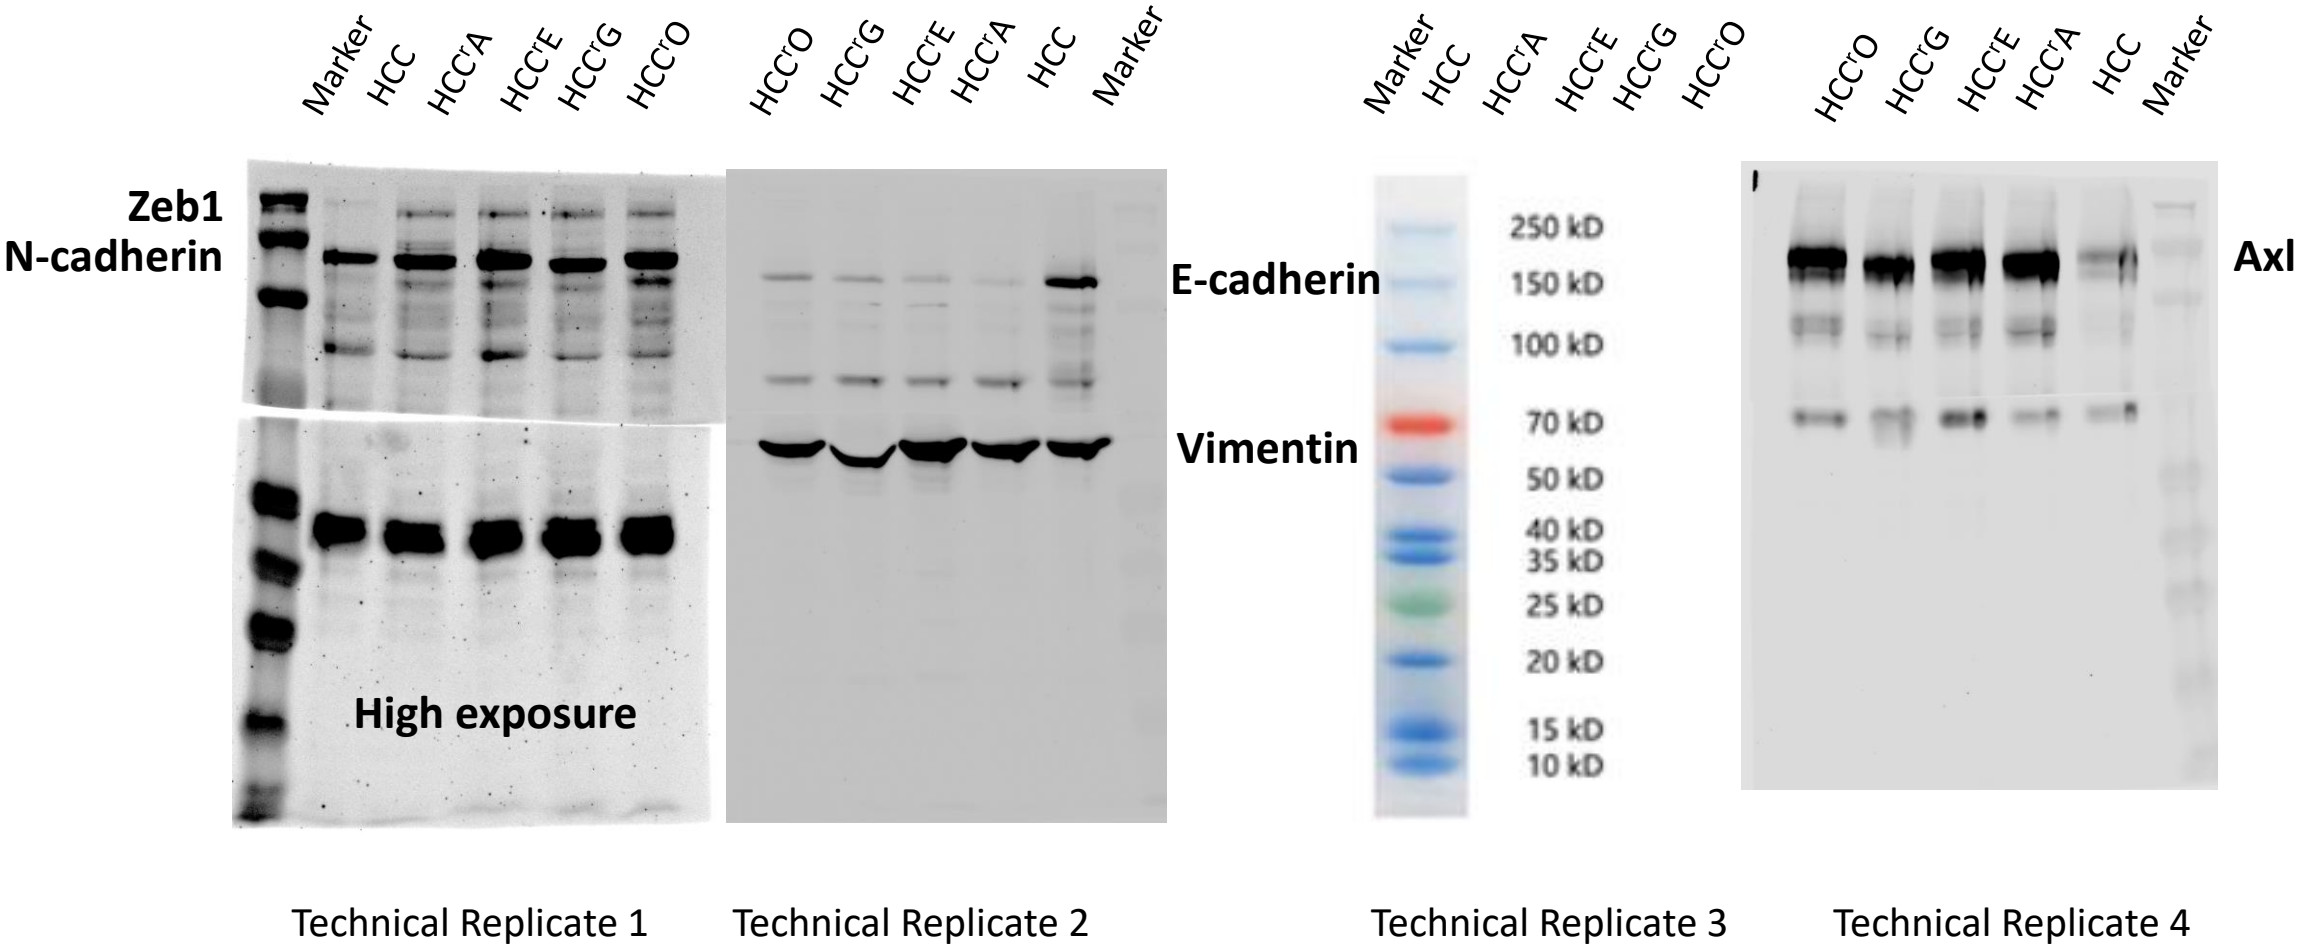

Biological Replicate 3

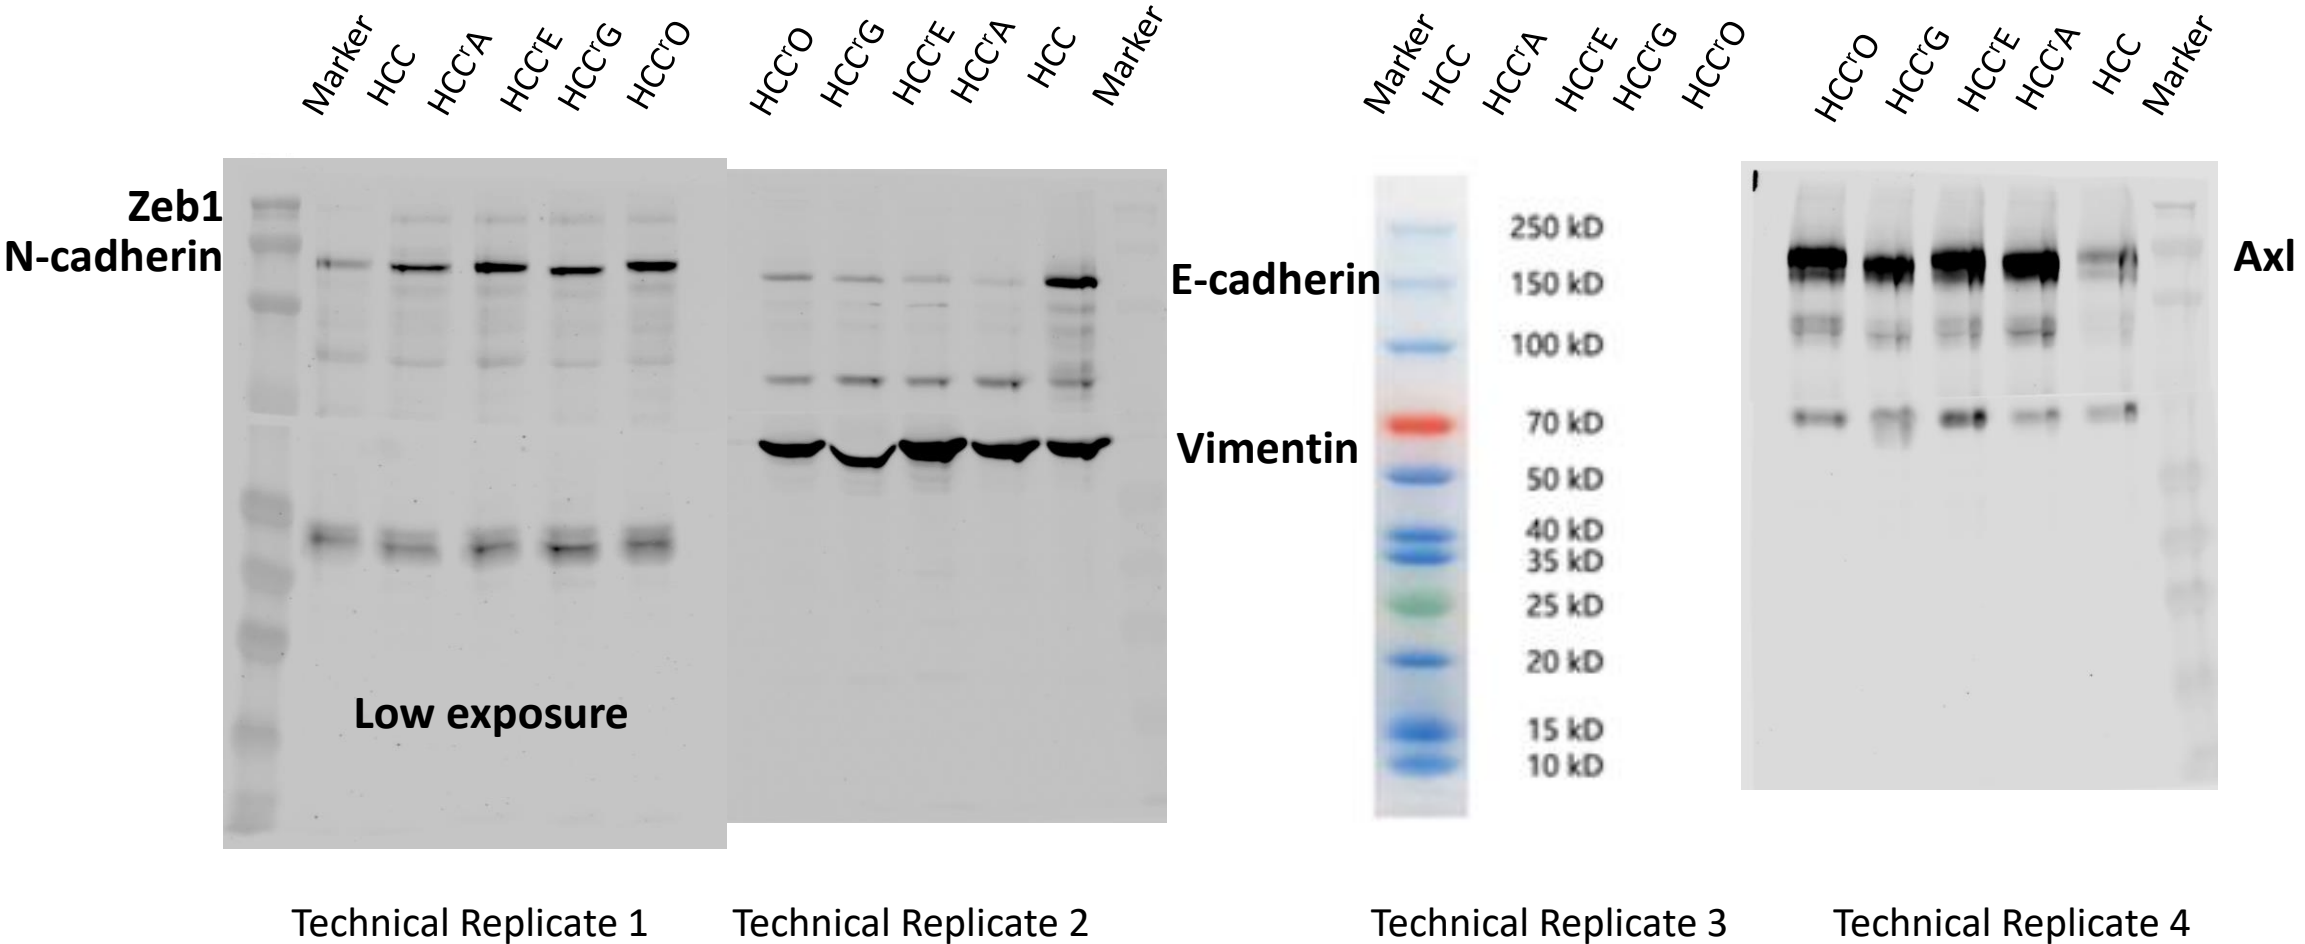

Supplement: s1 [file s1]
