# Supplementary material for: Loss of Key EMT-Regulating miRNAs Highlight the Role of ZEB1 in EGFR Tyrosine Kinase Inhibitor-Resistant NSCLC
Source: MDPI journal article supplement (doi:10.3390/ijms241914742), 2023-09-29
Supplement: s1 [file s1]

## Supplementary Materials

### Loss of Key EMT-Regulating miRNAs Highlight the Role of ZEB1 in EGFR Tyrosine Kinase Inhibitor-Resistant NSCLC

Linus Gohlke, Ahmad Alahdab, Angela Oberhofer, Karolina Worf, Stefan Holdenrieder, Martin Michaelis, Jindrich Cinatl Jr., Christoph A. Ritter

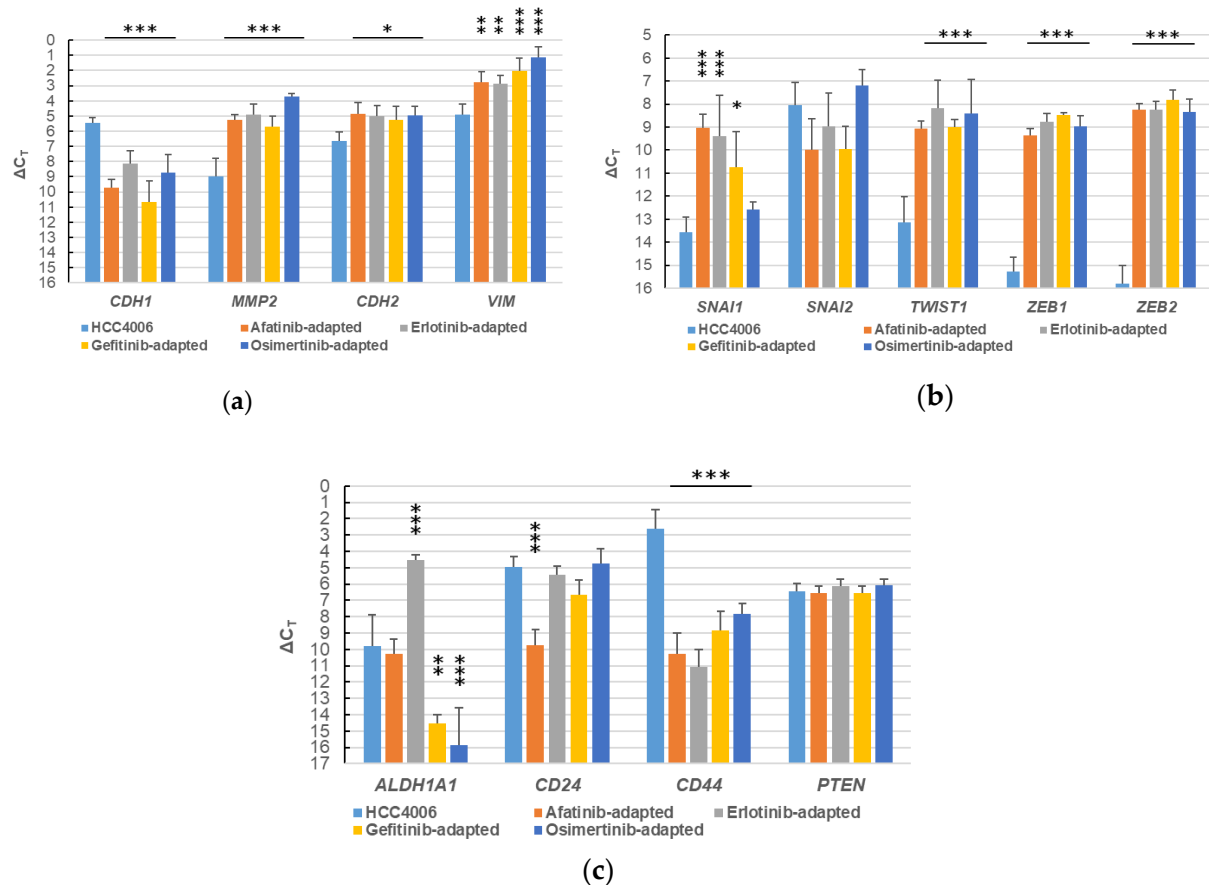

**Supplementary Figure S1.** Epithelial-mesenchymal transition is confirmed in all resistant cell lines: (a) Gene expression of EMT-markers, (b) EMT transcription factors, and (c) stem cell markers measured by qPCR. Results are displayed as the mean + SD of the delta- $C_T$  with  $n \geq 3$ . A 1-way ANOVA with Dunnett's post hoc test was used to test for statistically significant differences relative to the parental HCC4006 cell line, \*  $p < 0.05$ , \*\*  $p < 0.01$ , \*\*\*  $p < 0.001$ .

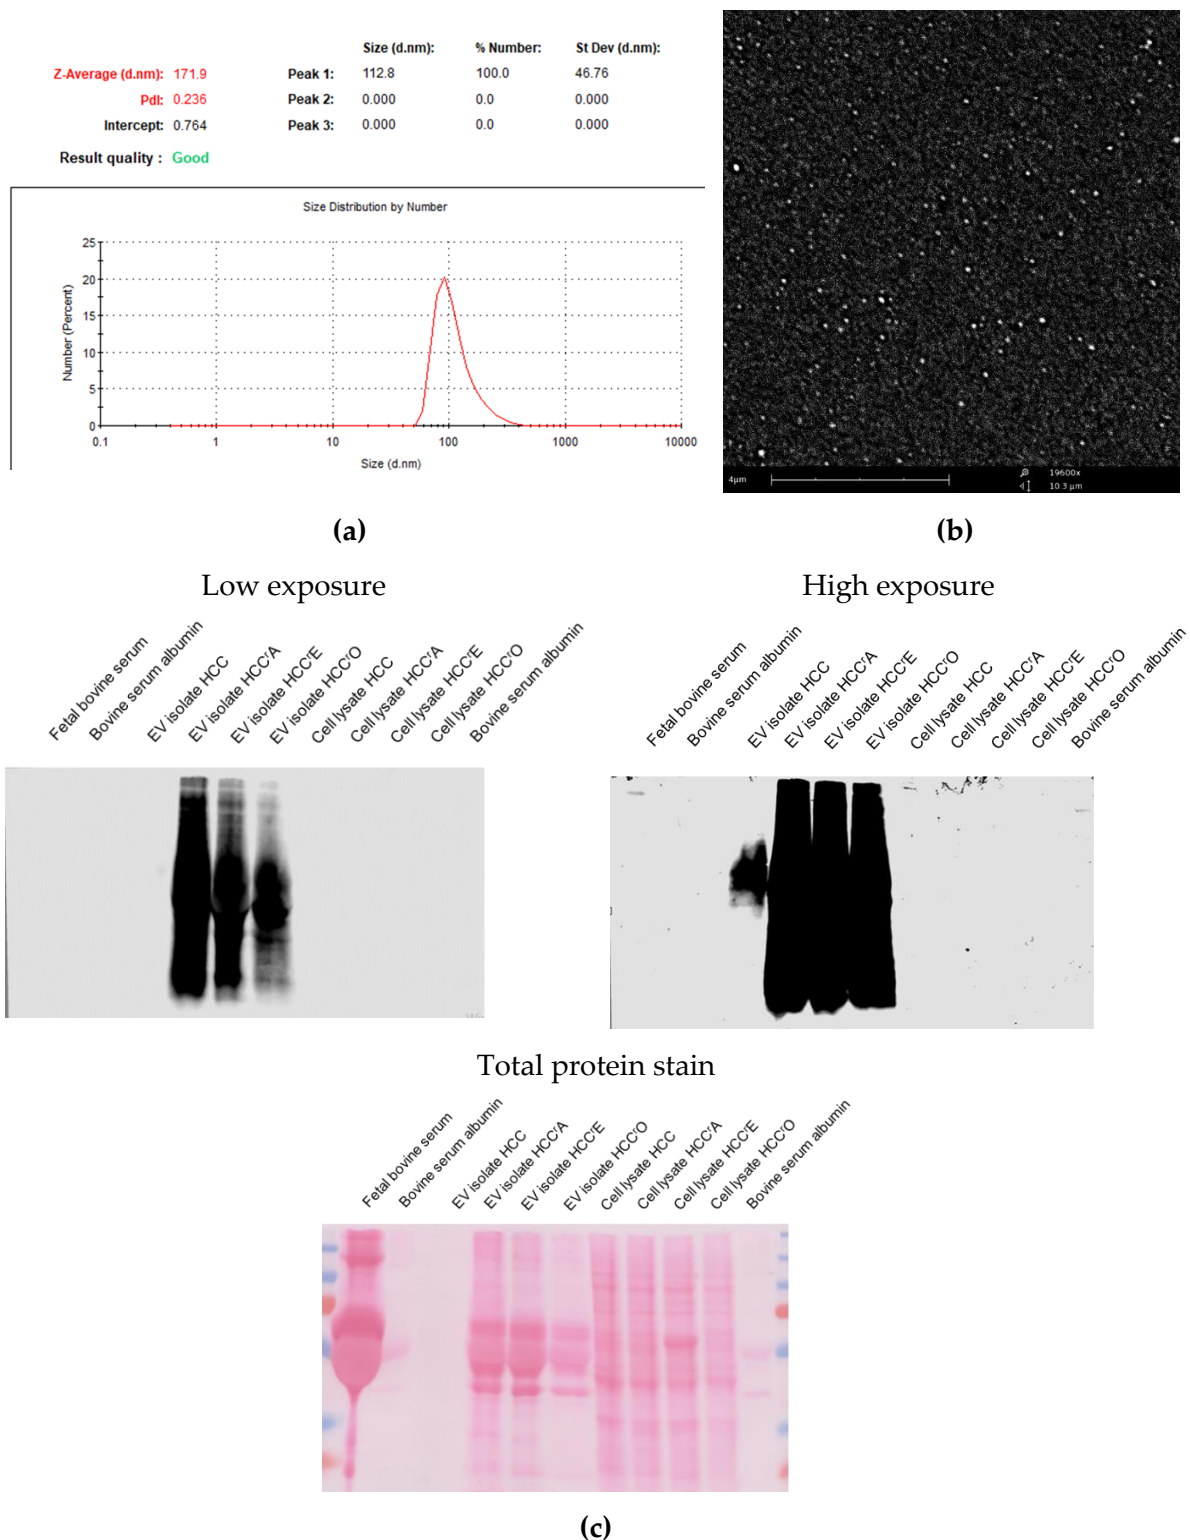

**Supplementary Figure S2:** Characterisation of extracellular vesicles (EVs): (a) EVs isolated from 16HBE14o-, HCC4006 and EGFR-TKI-resistant HCC4006 cells were analysed for size and size distribution using dynamic light scattering. (b) Size and round shaped morphology of isolated EVs was confirmed by scanning electron microscopy. (c) EVs, FBS, BSA and cell extracts were analysed for protein expression of exosome-enriched marker CD63 in HCC, HCCrE and HCCrO cells. 10 µL of FBS, EV isolate, 5 µg of BSA and 30 µg of cell extract were blotted on a nitrocellulose membrane and stained with Ponceau S total protein stain or a CD63-specific antibody (n = 1).

**Supplementary Table S1:** List of antibodies and dilutions

| Antibody                                                           | Dilution<br>Western blotting | Dilution<br>Immunocytochemistry |
|--------------------------------------------------------------------|------------------------------|---------------------------------|
| Axl (C89E7) Rabbit mAb #8861                                       | 1:1000                       | -                               |
| E-cadherin (24E10) Rabbit mAb #3195                                | 1:1000                       | 1:1600                          |
| N-cadherin (D4R1H) XP® Rabbit mAb # 13116                          | 1:1000                       | 1:100                           |
| Vimentin (D21H3) XP® Rabbit mAb #5741                              | 1:1000                       | -                               |
| ZEB1 (E2G9Y) XP® Rabbit mAb #70512                                 | 1:1000                       | -                               |
| CD63 Monoclonal Antibody (Ts63) #10628D                            | 1:250                        |                                 |
| IRDye® 800CW Goat anti-Rabbit IgG<br>Secondary Antibody #926-32211 | 1:10,000                     |                                 |
| IRDye® 800CW Goat anti-Mouse IgG<br>Secondary Antibody #926-32210  | 1:10,000                     |                                 |
| IRDye® 680LT Goat anti-Mouse IgG<br>Secondary Antibody #926-68020  | 1:20,000                     |                                 |
| IRDye® 680LT Goat anti-Rabbit IgG<br>Secondary Antibody #926-68021 | 1:20,000                     |                                 |

**Supplementary Table S2:** List of doubling times and IC<sub>50</sub> values of the parental and resistant HCC4006 cell lines

| Cell line                                | Doubling time [h] | Inhibitor   | IC <sub>50</sub> [nM] |
|------------------------------------------|-------------------|-------------|-----------------------|
| HCC4006                                  | 41.8 ± 7.5        | Afatinib    | 3.601 ± 0.81          |
|                                          |                   | Erlotinib   | 53.09 ± 2.34          |
|                                          |                   | Gefitinib   | 26.23 ± 15.87         |
|                                          |                   | Osimertinib | 3.75 ± 2.02           |
| HCC4006 <sup>r</sup> AFA <sup>0.1</sup>  | 53.7 ± 16.7       | Afatinib    | >100                  |
|                                          |                   | Osimertinib | >1000                 |
| HCC4006 <sup>r</sup> ERLO <sup>0.5</sup> | 54.0 ± 5.5        | Erlotinib   | >1000                 |
|                                          |                   | Osimertinib | >1000                 |
| HCC4006 <sup>r</sup> GEFI <sup>0.5</sup> | 61.0 ± 12.4       | Gefitinib   | >1000                 |
|                                          |                   | Osimertinib | >1000                 |
| HCC4006 <sup>r</sup> OSI <sup>0.5</sup>  | 66.7 ± 12.9       | Afatinib    | 579.6                 |
|                                          |                   | Erlotinib   | >1000                 |
|                                          |                   | Gefitinib   | >1000                 |
|                                          |                   | Osimertinib | >1000                 |

**Supplementary Table S3:** Primer sequences and efficiencies

| Gen/miRNA/<br>snRNA | Forward Primer          | Reverse Primer         | Efficiency<br>[%] |
|---------------------|-------------------------|------------------------|-------------------|
| <i>ALDH1A1</i>      | CGGGAAAAGCAATCTGAAGAGG  | GATGCGGCTATACAACACTGGC | 90.78             |
| <i>ACTB</i>         | CACCATTGGCAATGAGCGGTTT  | AGGTCTTTGCGGATGTCCACGT | 96.81             |
| <i>CD24</i>         | CACGCAGATTTATTCCAGTGAAA | GACCACGAAGAGACTGGCTGTT | 90.13             |

|                     |                                                              |                            |         |
|---------------------|--------------------------------------------------------------|----------------------------|---------|
| CD44                | CCAGAAGGAACAGTGGTTTGGC                                       | ACTGTCCTCTGGGCTTGGTGT      | 90.58   |
| CDH1                | GCCTCCTGAAAAGAGAGTGAAG                                       | TGGCAGTGTCTCTCCAAATCCG     | 98.83   |
| CDH2                | CCTCCAGAGTTTACTGCCATGAC                                      | GTAGGATCTCCGCCACTGATTC     | 90.53   |
| GAPDH               | GTCTCCTCTGACTTCAACAGCG                                       | ACCACCCTGTTGCTGTAGCCAA     | 95.35   |
| MMP2                | AGCGAGTGGATGCCGCCTTTAA                                       | CATCCAGGCATCTGCGATGAG      | 97.68   |
| PTEN                | TGAGTTCCTCAGCCGTTACCT                                        | GAGGTTTCCTCTGGTCCTGGTA     | 94.88   |
| RNU6                | GTCGTGAAGCGTTCCA                                             | CAGGTCCAGTTTTTTTTTTTTTAAA  | 98.65   |
| SNAI1               | TGCCCTCAAGATGCACATCCGA                                       | GGGACAGGAGAAGGGCTTCTC      | 91.68   |
| SNAI2               | ATCTGCGGCAAGGCGTTTCCA                                        | GAGCCCTCAGATTGACCTGTC      | 92.56   |
| TWIST1              | GCCAGGTACATCGACTTCCTCT                                       | TCCATCCTCCAGACCGAGAAGG     | 95.42   |
| VIM                 | AGGCAAAGCAGGAGTCCACTGA                                       | ATCTGGCGTTCAGGGACTCAT      | 91.15   |
| ZEB1                | GGCATAACCTACTCAACTACGG                                       | TGGGCGGTGTAGAATCAGAGTC     | 100.32  |
| ZEB2                | AATGCACAGAGTGTGGCAAGGC                                       | CTGCTGATGTGCGAACTGTAGG     | 96.92   |
| miR-9-5p            | GCAGTCTTTGGTTATCTAGCTGT                                      | GTCCAGTTTTTTTTTTTTTTCATACA | 86.724  |
| miR-21-5p           | TCAGTAGCTTATCAGACTGATG                                       | CGTCCAGTTTTTTTTTTTTTCAAC   | 113.029 |
| miR-34a-5p          | GGCAGTGTCTTAGCTGGT                                           | TCCAGTTTTTTTTTTTTTACAACCA  | 106.256 |
| miR-99a-5p          | CAGAACCCGTAGATCCGA                                           | GTCCAGTTTTTTTTTTTTTCAACAAG | 101.836 |
| miR-126-3p          | GCAGTCGTACCGTGAGTAA                                          | CCAGTTTTTTTTTTTTTTCGCAT    | 109.004 |
| miR-139-5p          | GTCTACAGTGCACGTGTC                                           | CCAGTTTTTTTTTTTTTACTGGAG   | 109.196 |
| miR-155-5p          | CGCAGTTAATGCTAATCGTGATA                                      | GGTCCAGTTTTTTTTTTTTTAACC   | 102.858 |
| miR-183-5p          | GCAGTATGGCACTGGTAGA                                          | GGTCCAGTTTTTTTTTTTTTAGTGA  | 108.645 |
| miR-192-5p          | CAGCTGACCTATGAATGACA                                         | TCCAGTTTTTTTTTTTTTGGCT     | 104.902 |
| miR-200c-3p         | AGTAATACTGCCGGGTAATGA                                        | TCCAGTTTTTTTTTTTTTCCATCA   | 99.441  |
| miR-203a-3p         | AGGTGAAATGTTTAGGACCAC                                        | GTCCAGTTTTTTTTTTTTTCTAGTG  | 103.881 |
| miR-205-5p          | CCTTCATTCCACCGGAGT                                           | GGTCCAGTTTTTTTTTTTTTCAGA   | 114.939 |
| miR-374a-5p         | GCGCAGTTATAATACAACCTGA                                       | GGTCCAGTTTTTTTTTTTTTCACT   | 98.679  |
| miR-378a-5p         | TCCTGACTCCAGGTCTT                                            | GGTCCAGTTTTTTTTTTTTTACACA  | 106.167 |
| miR-451a            | CGCAGAAACCGTTACCA                                            | GTCCAGTTTTTTTTTTTTTAACTCA  | 101.153 |
| miR-544a            | GCAGATTCTGCATTTTAGCAAG                                       | GGTCCAGTTTTTTTTTTTTTGAAC   | 83.946  |
| Universal RT Primer | CAGGTCCAGTTTTTTTTTTTTTVN (V = A, C and G; N = A, C, G and T) |                            |         |

**Supplementary Table S4:** Mimic and negative control mimic sequence

| Mimics        | Sense (5'-3')          | Antisense (5'-3')      |
|---------------|------------------------|------------------------|
| miR-205-5p    | UCCUUCAUUCCACCGGAGUCUC | GACUCCGGUGGAAUGAAGGAUU |
| miR-205-5p NC | UUCUCCGAACGUGUCACGUTT  | ACGUGACACGUUCGGAGAATT  |

**Supplementary Table S5:** Size of extracellular vesicles determined by dynamic light scattering

| Cell line                                | Peak Size [nm] | Z-Average [nm] | Polydispersity Index |
|------------------------------------------|----------------|----------------|----------------------|
| 16HBE14o-                                | 125.4          | 189.6          | 0.240                |
| HCC4006                                  | 120.5          | 185.5          | 0.399                |
| HCC4006 <sup>+</sup> AFA <sup>0.1</sup>  | 103.6          | 195.9          | 0.317                |
| HCC4006 <sup>+</sup> ERLO <sup>0.5</sup> | 58.3           | 121.3          | 0.343                |
| HCC4006 <sup>+</sup> GEFI <sup>0.5</sup> | 101.8          | 151.2          | 0.289                |
| HCC4006 <sup>+</sup> OSI <sup>0.5</sup>  | 106.4          | 194.4          | 0.367                |

**Supplementary Table S6:** Size of extracellular vesicles from HCCrA determined by scanning electron microscopy

| HCC4006rAFA <sup>0.1</sup> | Size [nm] | SD [nm] |
|----------------------------|-----------|---------|
|                            | 113.8     | 21.6    |
