# Supplementary material for: Loss of Key EMT-Regulating miRNAs Highlight the Role of ZEB1 in EGFR Tyrosine Kinase Inhibitor-Resistant NSCLC
Source: Int J Mol Sci. 2023 Sep 29;24(19):14742. doi: 10.3390/ijms241914742 (PMC10573279; doi:10.3390/ijms241914742)
Supplement: Supplementary file 1 [file ijms-24-14742-s001.zip › Cell-derived miRNA expression data.xlsx]

## Sheet: Tabelle1
Supplementary Table S7: Cell-derived miRNA expression
				One-Way ANOVA with Dunnett's post hoc test
Target Name	Biogroup-Sample	EQ.Ct Mean	Delta Ct	p-value
miR-9-5p	HBE-1	23.554	3.3908	0.74
	HBE-2	23.074	3.17615
	HBE-3	22.494	2.67835
	HCC-1	22.4982	2.90216
	HCC-2	24.4275	4.17577
	HCC-3	24.6949	4.73243
	HCCrA-1	26.9035	6.90116	0.003
	HCCrA-2	28.0083	8.45245
	HCCrA-3	27.3777	7.36625
	HCCrE-1	26.7713	6.77205	0.11
	HCCrE-2	27.4019	6.86519
	HCCrE-3	24.7977	4.17491
	HCCrG-1	26.272	5.29802	0.96
	HCCrG-2	24.3287	3.75783
	HCCrG-3	24.4415	4.16493
	HCCrO-1	25.0349	4.55904	0.98
	HCCrO-2	25.1736	5.32787
	HCCrO-3	23.9697	3.10998
miR-21-5p	HBE-1	16.9605	-3.20274	0.7011
	HBE-2	16.9105	-2.98742
	HBE-3	16.2848	-3.53086
	HCC-1	15.17	-4.42599
	HCC-2	16.2538	-3.99795
	HCC-3	16.5615	-3.40102
	HCCrA-1	15.4717	-4.5306	0.6861
	HCCrA-2	17.8437	-1.71212
	HCCrA-3	16.5766	-3.43491
	HCCrE-1	15.2554	-4.74376	0.6557
	HCCrE-2	16.2092	-4.32744
	HCCrE-3	15.6337	-4.98908
	HCCrG-1	16.7869	-4.18705	0.1737
	HCCrG-2	14.5366	-6.03433
	HCCrG-3	14.5909	-5.68572
	HCCrO-1	15.121	-5.35489	0.2958
	HCCrO-2	15.147	-4.69877
	HCCrO-3	15.6583	-5.20147
miR-34a-5p	HBE-1	22.415	2.25174	0.6
	HBE-2	22.8522	2.95432
	HBE-3	23.1734	3.35769
	HCC-1	21.0721	1.47603
	HCC-2	22.1014	1.84967
	HCC-3	23.0587	3.09623
	HCCrA-1	25.3008	5.29846	<0,001
	HCCrA-2	26.4989	6.94307
	HCCrA-3	26.0336	6.02208
	HCCrE-1	24.5264	4.52715	0.02
	HCCrE-2	24.3563	3.8196
	HCCrE-3	24.4892	3.86644
	HCCrG-1	24.5593	3.58538	0.83
	HCCrG-2	22.5077	1.9368
	HCCrG-3	22.695	2.41843
	HCCrO-1	23.0436	2.56776	0.9
	HCCrO-2	22.9114	3.0656
	HCCrO-3	22.9539	2.09416
miR-99a-5p	HBE-1	19.5785	-3.04895	>0,99
	HBE-2	19.1358	-3.22197
	HBE-3	18.8057	-3.44752
	HCC-1	18.2478	-2.90057
	HCC-2	17.2895	-3.44477
	HCC-3	18.8907	-3.38371
	HCCrA-1	17.2167	-5.18814	0.007
	HCCrA-2	18.0676	-3.77679
	HCCrA-3	17.442	-4.78172
	HCCrE-1	18.0686	-4.34643	0.08
	HCCrE-2	18.467	-3.98264
	HCCrE-3	18.311	-4.02072
	HCCrG-1	17.9237	-4.22529	0.04
	HCCrG-2	17.6052	-4.39718
	HCCrG-3	17.6307	-4.08231
	HCCrO-1	19.0017	-2.63684	0.92
	HCCrO-2	18.9835	-2.77632
	HCCrO-3	18.4291	-3.59782
miR-126-3p	HBE-1	24.2233	4.06012	<0,001
	HBE-2	23.9136	4.01566
	HBE-3	23.3275	3.51186
	HCC-1	25.9311	6.33506
	HCC-2	27.4226	7.17089
	HCC-3	27.3136	7.35109
	HCCrA-1	24.1392	4.13683	0.04
	HCCrA-2	26.3511	6.79531
	HCCrA-3	24.7715	4.75998
	HCCrE-1	24.0621	4.06288	0.001
	HCCrE-2	24.7932	4.25654
	HCCrE-3	24.6481	4.02531
	HCCrG-1	23.773	2.79907	<0,001
	HCCrG-2	24.3768	3.80593
	HCCrG-3	24.5595	4.28287
	HCCrO-1	25.1644	4.68851	0.01
	HCCrO-2	24.9182	5.0724
	HCCrO-3	25.6926	4.83288
miR-139-5p	HBE-1	28.0093	5.38176	0.05
	HBE-2	27.7148	5.35695
	HBE-3	27.5158	5.26255
	HCC-1	25.1834	4.03501
	HCC-2	25.1918	4.45751
	HCC-3	26.9989	4.72451
	HCCrA-1	25.405	3.00017	0.04
	HCCrA-2	25.9036	4.05922
	HCCrA-3	25.4619	3.23818
	HCCrE-1	26.5625	4.1475	>0,99
	HCCrE-2	26.8876	4.43796
	HCCrE-3	26.7123	4.38063
	HCCrG-1	26.1516	4.00255	0.02
	HCCrG-2	24.6909	2.68853
	HCCrG-3	24.8275	3.11445
	HCCrO-1	25.0694	3.43088	0.03
	HCCrO-2	24.8837	3.12393
	HCCrO-3	25.5297	3.5027
miR-155-5p	HBE-1	33.5842	10.9567	<0,001
	HBE-2	35.0351	12.6773
	HBE-3	35.4671	13.2138
	HCC-1	24.8723	3.72386
	HCC-2	23.6124	1.85262
	HCC-3	24.6174	2.34305
	HCCrA-1	22.4313	0.026473	0.03
	HCCrA-2	22.487	0.642561
	HCCrA-3	22.3423	0.118639
	HCCrE-1	22.3167	-0.0983791	0.02
	HCCrE-2	22.7753	0.325637
	HCCrE-3	22.6636	0.331916
	HCCrG-1	22.1849	0.0358836	0.03
	HCCrG-2	22.1942	0.191765
	HCCrG-3	22.0904	0.377343
	HCCrO-1	23.539	1.90043	0.15
	HCCrO-2	23.6124	1.85262
	HCCrO-3	21.1907	-0.836248
miR-183-5p	HBE-1	21.6132	-1.0143	>0,99
	HBE-2	22.0668	-0.291015
	HBE-3	21.4576	-0.79565
	HCC-1	20.9321	-0.216311
	HCC-2	19.4841	-1.25016
	HCC-3	22.1842	-0.0901988
	HCCrA-1	24.7368	2.33196	<0,001
	HCCrA-2	25.8967	4.05229
	HCCrA-3	25.1377	2.91398
	HCCrE-1	24.5393	2.12425	<0,001
	HCCrE-2	24.9748	2.52522
	HCCrE-3	24.8666	2.53491
	HCCrE-4	24.8809	3.16557
	HCCrE-5	25.5108	3.46226
	HCCrE-6	25.1961	3.33195
	HCCrG-1	24.9721	2.82312	0.09
	HCCrG-2	22.0458	0.043334
	HCCrG-3	22.1261	0.413034
	HCCrO-1	22.4702	0.831678	0.08
	HCCrO-2	22.454	0.694202
	HCCrO-3	23.8724	1.84543
miR-192-5p	HBE-1	25.088	2.46046	0.22
	HBE-2	24.5402	2.18236
	HBE-3	23.9424	1.68914
	HCC-1	23.8685	2.72011
	HCC-2	23.115	2.38078
	HCC-3	25.6355	3.36116
	HCCrA-1	25.0063	2.60148	0.54
	HCCrA-2	25.7188	3.87436
	HCCrA-3	25.6562	3.43249
	HCCrE-1	24.3459	1.93089	0.37
	HCCrE-2	25.1784	2.72877
	HCCrE-3	24.3764	2.0447
	HCCrG-1	23.9687	1.8197	0.23
	HCCrG-2	24.1469	2.14451
	HCCrG-3	24.1042	2.39115
	HCCrO-1	24.3914	2.75291	0.96
	HCCrO-2	24.4254	2.66564
	HCCrO-3	24.4313	2.40435
miR-200c-3p	HBE-1	18.5358	-1.62745	0.98
	HBE-2	18.4783	-1.4196
	HBE-3	18.042	-1.77368
	HCC-1	18.15	-1.44604
	HCC-2	20.0331	-0.218623
	HCC-3	19.2153	-0.74724
	HCCrA-1	28.2916	8.28931	<0,001
	HCCrA-2	30.018	10.4622
	HCCrA-3	28.8199	8.80842
	HCCrE-1	26.8532	6.85404	0.001
	HCCrE-2	27.645	7.1083
	HCCrE-3	27.5584	6.93566
	HCCrG-1	27.6363	6.66232	0.04
	HCCrG-2	29.293	6.16943
	HCCrG-3	19.1746	-1.10204
	HCCrO-1	21.2732	0.797311	0.64
	HCCrO-2	21.3453	1.49959
	HCCrO-3	21.639	0.779208
miR-203a-3p	HBE-1	24.2812	1.49923	0.97
	HBE-2	24.2635	1.58844
	HBE-3	23.5513	1.04957
	HCC-1	23.1525	1.66659
	HCC-2	23.3371	0.838562
	HCC-3	25.1473	2.52309
	HCCrA-1	29.2729	6.4049	<0,001
	HCCrA-2	30.6192	8.0353
	HCCrA-3	29.5817	6.93665
	HCCrE-1	30.541	7.62804	<0,001
	HCCrE-2	30.7028	7.945
	HCCrE-3	30.3595	7.84936
	HCCrG-1	28.4172	5.87959	<0,001
	HCCrG-2	26.4449	3.98754
	HCCrG-3	26.5013	4.43909
	HCCrO-1	27.5623	5.5383	<0,001
	HCCrO-2	27.6041	5.42365
	HCCrO-3	27.2672	4.94158
miR-205-5p	HBE-1	15.1313	-7.65059	0.02
	HBE-2	15.1076	-7.56745
	HBE-3	14.5272	-7.9745
	HCC-1	21.019	-0.466878
	HCC-2	19.4123	-3.08626
	HCC-3	18.4237	-4.20044
	HCC-4	18.193	-1.84995
	HCC-5	18.9755	-1.57307
	HCC-6	17.9211	-2.55213
	HCCrA-1	30.814	7.94602	<0,001
	HCCrA-2	31.2816	8.69766
	HCCrA-3	31.0562	8.41119
	HCCrE-1	31.3144	8.40147	<0,001
	HCCrE-2	30.9192	8.1614
	HCCrE-3	30.7627	8.25253
	HCCrE-4	30.5566	8.8412
	HCCrE-5	30.9929	8.94433
	HCCrE-6	31.2264	9.36232
	HCCrG-1	30.7956	8.25793	<0,001
	HCCrG-2	33.6458	10.5223
	HCCrG-3	22.7742	0.71192
	HCCrO-1	30.2343	8.21027	<0,001
	HCCrO-2	30.3021	8.1216
	HCCrO-3	22.8054	0.479782
miR-374a-5p	HBE-1	23.5773	0.79543	0.76
	HBE-2	23.2643	0.589271
	HBE-3	22.229	-0.272721
	HCC-1	22.1562	0.670301
	HCC-2	23.8416	1.34304
	HCC-3	23.7949	1.17074
	HCCrA-1	23.4195	0.551472	0.68
	HCCrA-2	26.209	3.62506
	HCCrA-3	23.9887	1.34369
	HCCrE-1	22.7924	-0.120569	0.35
	HCCrE-2	22.7382	-0.019604
	HCCrE-3	22.3851	-0.125063
	HCCrG-1	22.7951	0.257511	0.11
	HCCrG-2	21.2789	-1.17844
	HCCrG-3	21.2245	-0.837744
	HCCrO-1	21.956	-0.0680183	0.76
	HCCrO-2	22.0992	-0.0812799
	HCCrO-3	23.5666	1.24104
miR-378a-5p	HBE-1	25.8232	3.04125	0.11
	HBE-2	25.1956	2.52054
	HBE-3	25.3049	2.80315
	HCC-1	24.9285	3.44264
	HCC-2	26.8963	4.39777
	HCC-3	26.3363	3.71209
	HCCrA-1	24.961	2.093	0.11
	HCCrA-2	26.1421	3.55814
	HCCrA-3	25.4126	2.76754
	HCCrE-1	25.8785	2.96557	0.08
	HCCrE-2	25.4964	2.73854
	HCCrE-3	24.9852	2.47509
	HCCrG-1	25.5406	3.00301	0.05
	HCCrG-2	24.6359	2.17854
	HCCrG-3	24.6705	2.6083
	HCCrO-1	24.469	2.445	0.13
	HCCrO-2	24.533	2.35256
	HCCrO-3	26.0567	3.73107
miR-451a	HBE-1	27.0048	4.22287	0.2
	HBE-2	27.0267	4.35166
	HBE-3	26.5141	4.01241
	HCC-1	25.0055	3.51961
	HCC-2	25.6003	3.10179
	HCC-3	25.9287	3.30449
	HCCrA-1	26.0689	3.20087	>0,99
	HCCrA-2	26.5566	3.97262
	HCCrA-3	25.1753	2.53025
	HCCrE-1	25.9858	3.07284	0.82
	HCCrE-2	25.899	3.14117
	HCCrE-3	25.0405	2.53036
	HCCrG-1	25.6699	3.13227	0.9
	HCCrG-2	25.2971	2.83973
	HCCrG-3	25.034	2.97176
	HCCrO-1	24.7508	2.72683	0.05
	HCCrO-2	24.6475	2.46706
	HCCrO-3	23.2993	0.973713
